# Supplementary material for: Amorphous covalent inorganic–organic hybrid frameworks (CIOFs) with an aggregation induced selective response to UV–Visible light and their DFT studies
Source: Royal Society of Chemistry journal article supplement (doi:10.1039/d0tc01535k), 2020-01-01
Supplement: d0tc01535k1.pdf [file d0tc01535k1.pdf]

## ***Supporting Information***

### **Amorphous covalent inorganic-organic hybrid frameworks (CIOFs) with an aggregation induced selective response to UV-visible light and their DFT studies**

Majid Basharat<sup>†</sup>, Yasir Abbas<sup>†</sup>, Djebbar Hadji<sup>ψ</sup>, Zahid Ali<sup>†</sup>, Shuangkun Zhang<sup>†</sup>, Hanlin Ma<sup>†</sup>, Zhanpeng Wu<sup>†\*</sup> and Wei Liu<sup>‡\*</sup>

<sup>†\*</sup>*Key Laboratory of Carbon Fiber and Functional Polymers (Beijing University of Chemical Technology) Ministry of Education, Beijing 100029, P. R. China. E-mail: wuzp@mail.buct.edu.cn*

<sup>ψ</sup>*Modeling and Calculation Methods Laboratory, Department of Chemistry, University Dr. Moulay Tahar of Saida, 20000 Saida, Algeria.*

<sup>‡\*</sup>*College of Materials Science and Engineering, (Beijing University of Chemical Technology) Ministry of Education, Beijing 100029, P. R. China Email: 2018710010@mail.buct.edu.cn*

### **Quantum calculation methods in materials studio**

The crystal structures (HCCP, BPS, and TATA) for the density functional theory (DFT) and first-principle calculations were obtained from the PubChem database (<https://pubchem.ncbi.nlm.nih.gov>). The plane wave DFT calculation conducted using the Cambridge Sequential Total Energy Package (CASTEP) packaged in Materials studio 2017 (BIOVIA) (<https://www.3dsbiovia.com/products/datasheets/castep.pdf>).<sup>1</sup> The exchange-correlation functional under the generalized gradient approximation (GGA)<sup>2</sup> was used as exchange-correlation functional with norm-conserving pseudopotentials. The describe the electron-electron interaction Perdew-Burke-Ernzerh (PBE) was implemented as functional.<sup>3</sup> Materials Studio DMoL3 was used to optimize the ground state geometries in the gaseous state by

using GGA as an exchange-correlation function for all electrons.<sup>4</sup> DNP basis set 4.4 was used with for all-electron calculations. The PBE functional was used with fine quality. The electron densities were visualized in Materials Studio. DMoL<sup>3</sup> achieves its speed and accuracy by using numerical functions (<https://www.3dsbiovia.com/products/datasheets/dmol3.pdf>) on an atom-centered grid as its atomic basis. The DFT equations can be solved for the individual atoms to get the atomic basis functions so it is quite accurate.

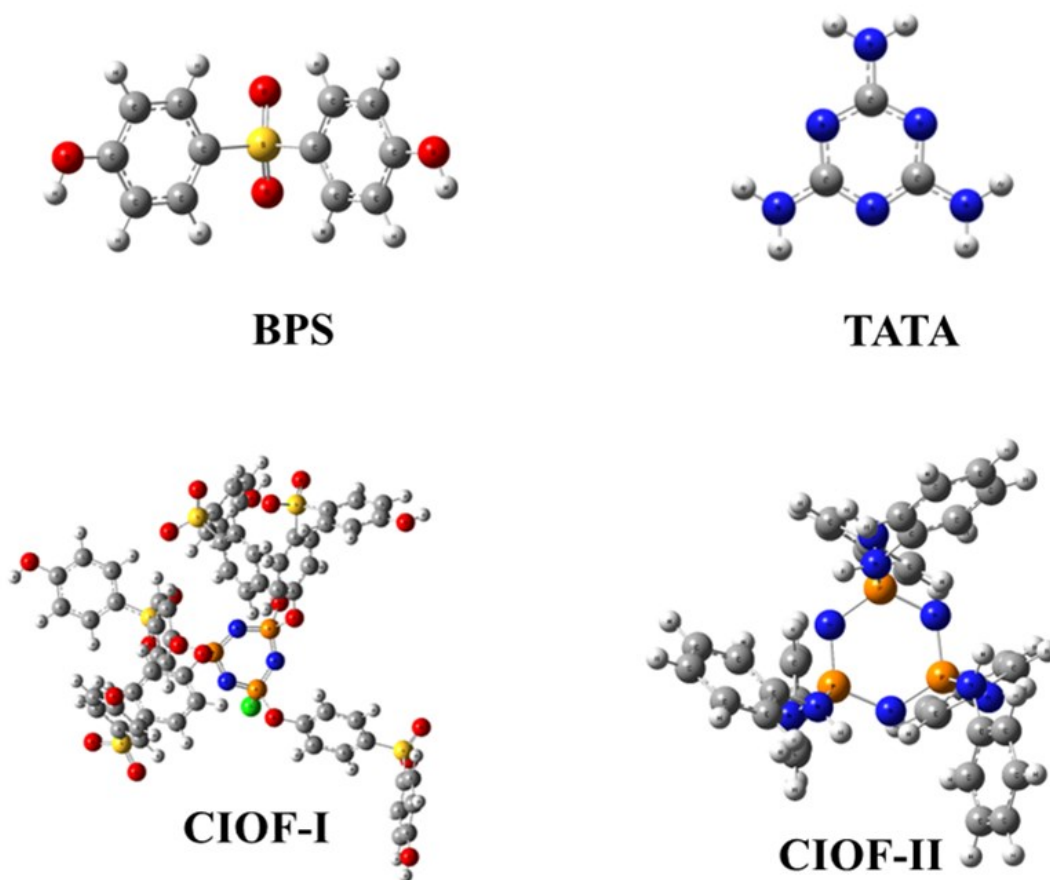

**Fig. S1.** Optimized structures of BPS, TATA, and their derived CIOF-I and CIOF-II at B3LYP/6-311+G(*d,p*) level on Gaussian 09.

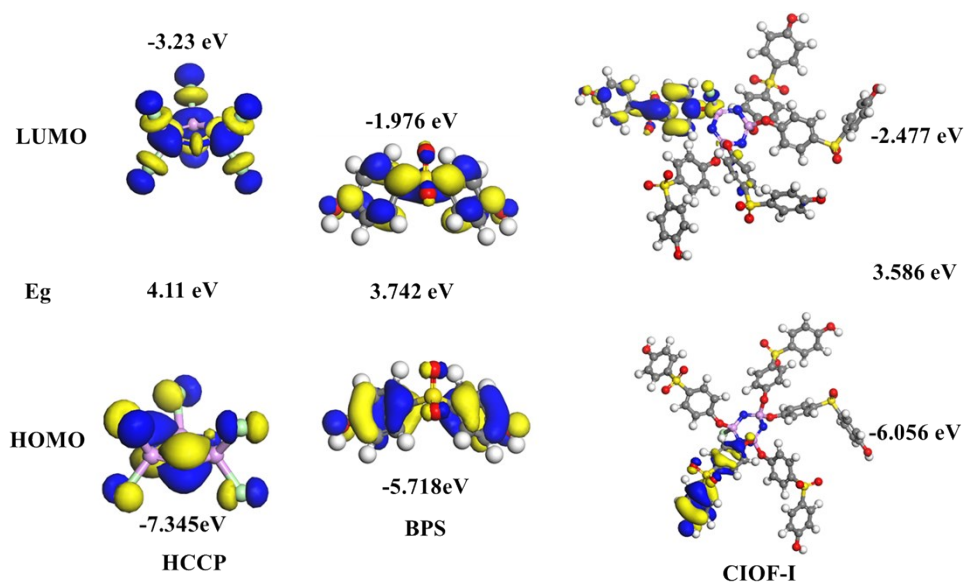

**Fig. S2.** Optimized structure for HCCP, BPS, and ClOF-I along with their frontier electron densities and their potentials calculated by using GGA/PBE/DNP 4.4 basis set on DMOL<sup>3</sup> DFT package in Materials Studio.

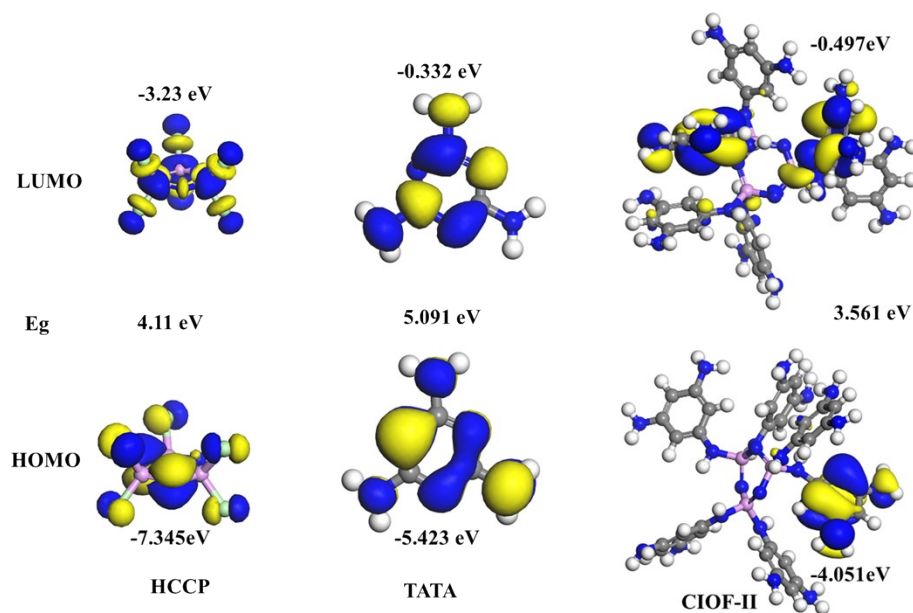

**Fig. S3.** Optimized structure for HCCP, TATA, and ClOF-II along with their frontier electron densities and their potentials calculated by using GGA/PBE/DNP 4.4 basis set on DMOL<sup>3</sup> DFT package in Materials Studio.

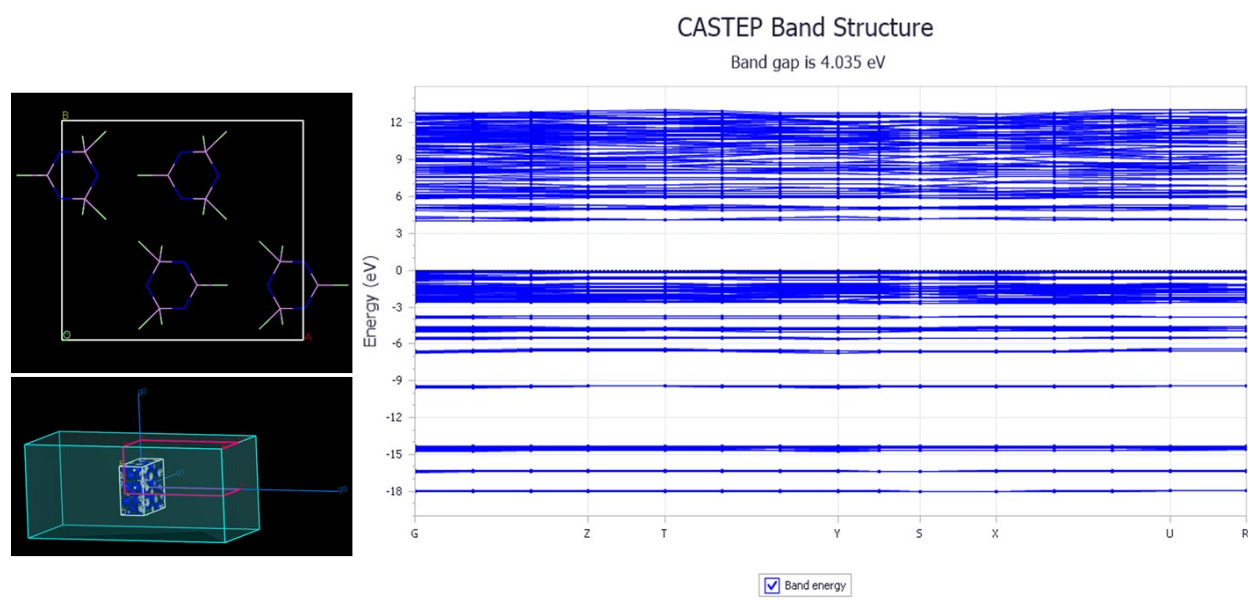

**Fig. S4.** The optimized crystal structure for HCCP (obtained from PubChem database ) with electron densities and their band structure calculated by using the CASTEP Plane Wave DFT package in Materials Studio.

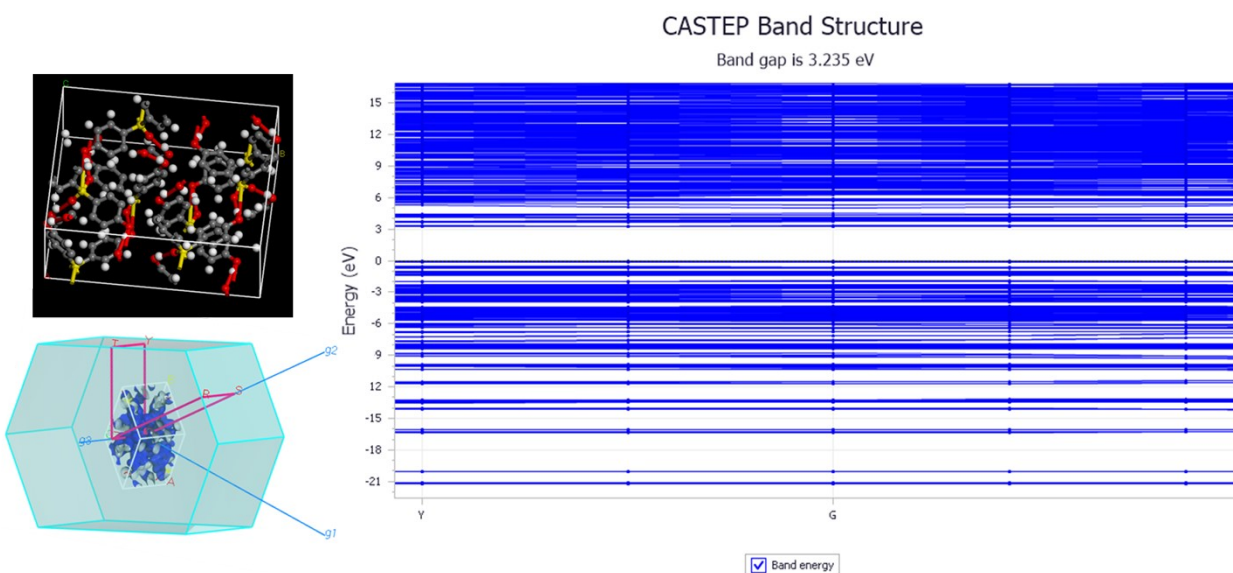

**Fig. S5.** The optimized crystal structure for BPS (obtained from PubChem database) with electron densities and their band structure calculated by using the CASTEP Plane Wave DFT package in Materials Studio.

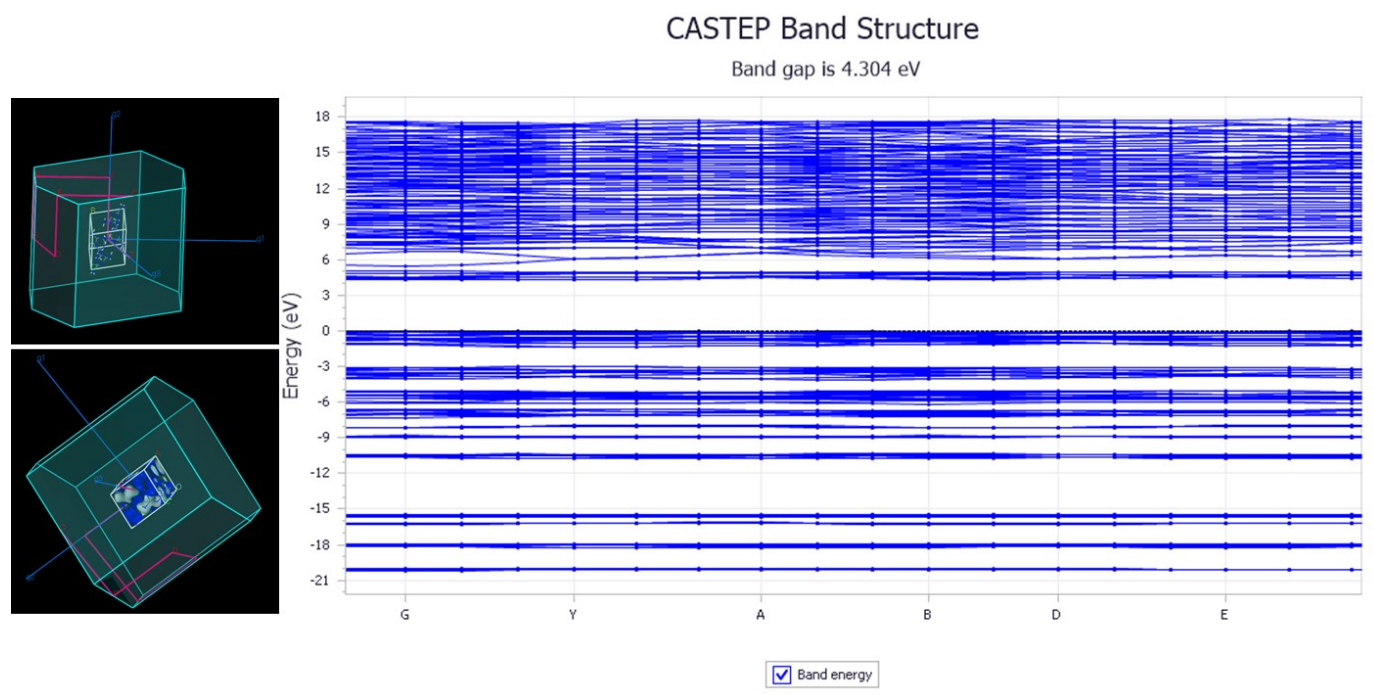

**Fig. S6.** The optimized crystal structure for TATA (obtained from PubChem database) with electron densities and their band structure calculated by using the CASTEP Plane Wave DFT package in Materials Studio.

**Table S1.** Comparison of the different computational methods used for the determination of  $E_g$  along with the experimental values.

|                         | <b>Gaussian 09</b>           | <b>DMol<sup>3</sup></b>      | <b>CASTEP</b>                    | <b>Experimental <math>E_g</math></b> |
|-------------------------|------------------------------|------------------------------|----------------------------------|--------------------------------------|
|                         | <b>B3LYP/6–</b>              | <b>GGA/PBE/DNP/4.4/Fine</b>  | <b>GGA/PBE/Norm–</b>             | <b>(eV) from</b>                     |
|                         | <b>311+G (d,p)</b>           | <b>(<math>E_g</math> eV)</b> | <b>conserving (crystal form)</b> | <b>Absorbance edge</b>               |
|                         | <b>(<math>E_g</math> eV)</b> |                              | <b>(<math>E_g</math> eV)</b>     |                                      |
| <b>HCCP<sup>5</sup></b> | 5.745                        | 4.11                         | 4.035                            | 4.80                                 |
| <b>BPS</b>              | 4.05                         | eV                           | 3.325                            | 3.79                                 |
| <b>TATA</b>             | 4.79                         | 5.091                        | 4.30                             | 4.25                                 |
| <b>CIOF-I</b>           | 3.92                         | 3.586                        | -----                            | 3.84                                 |
| <b>CIOF-II</b>          | 3.89                         | 3.561 eV                     | -----                            | 3.81                                 |

1. M. Segall, P. J. Lindan, M. a. Probert, C. J. Pickard, P. J. Hasnip, S. Clark and M. Payne, *J. Phys. Condens. Matter.*, 2002, **14**, 2717.
2. J. P. Perdew, K. Burke and M. Ernzerhof, *Phys. Rev. Lett.*, 1996, **77**, 3865.
3. D. Hamann, M. Schlüter and C. Chiang, *Phys. Rev. Lett.*, 1979, **43**, 1494.
4. B. Delley, *J. Phys. Chem. A*, 2006, **110**, 13632-13639.
5. W. M. Zoghaib, J. Husband, U. A. Soliman, I. A. Shaaban and T. A. Mohamed, *Spectrochim. Acta A Mol. Biomol. Spectrosc.*, 2013, **105**, 446-455.
